# Supplementary material for: A positive synergetic effect observed in the P3HT–SnO2 composite semiconductor: the striking increase of carrier mobility
Source: Royal Society of Chemistry journal article supplement (doi:10.1039/c5ra21762h), 2015-12-23
Supplement: c5ra21762h1.pdf [file c5ra21762h1.pdf]

## Supporting Information

### A Positive Synergetic Effect Observed in SnO<sub>2</sub>-P3HT Composite

#### Semiconductor: The Striking Increase of Carrier Mobility

Yujing Geng<sup>1</sup>, Tianyu Zhao<sup>1</sup>, Gang Lian<sup>1\*</sup>, Xinhang Cui<sup>1#</sup>, Yang Liu<sup>1</sup>, Jinli Liu<sup>1</sup>,

Qilong Wang<sup>1,2</sup>, Deliang Cui<sup>1\*</sup>

*1 State Key Lab of Crystal Materials, Shandong University, Jinan 250100, P. R. China*

*2 Key Laboratory for Special Functional Aggregated Materials of Education Ministry, School of Chemistry & Chemical Engineering, Shandong University, Jinan 250100, P. R. China.*

*# Present address: Faculty of Sciences, National University of Singapore, Singapore 119617*

*\* To whom correspondence should be addressed, E-mail: cuidl@sdu.edu.cn, liangang@sdu.edu.cn,*

*Fax: +86-531-88361856*

#### **S1. Specific surface area and pore-size distribution of SnO<sub>2</sub> PNS**

Specific surface area (SSA) and pore-size distribution are two important parameters to characterize SnO<sub>2</sub> PNS. These parameters were determined by nitrogen adsorption/desorption isotherms obtained at -196 °C on an Accelerated Surface Area and Porosimetry 2000 Analyzer. The SSA value of the typical sample was calculated to be 7.9 m<sup>2</sup>/g using Brunauer-Emmett-Teller (BET) model. Fig. S1 shows the nitrogen absorption/desorption isotherm and pore-size distribution of this SnO<sub>2</sub> PNS sample. It can be seen that the slopes of both absorption and desorption curves are very steep, and the hysteresis loop is rather narrow, indicating that the pressures of condensation and evaporation are quite close to the saturation vapor pressure. The inset of Figure S1 demonstrates that the size of the pores mainly distributed within the range of 40~140

nm.

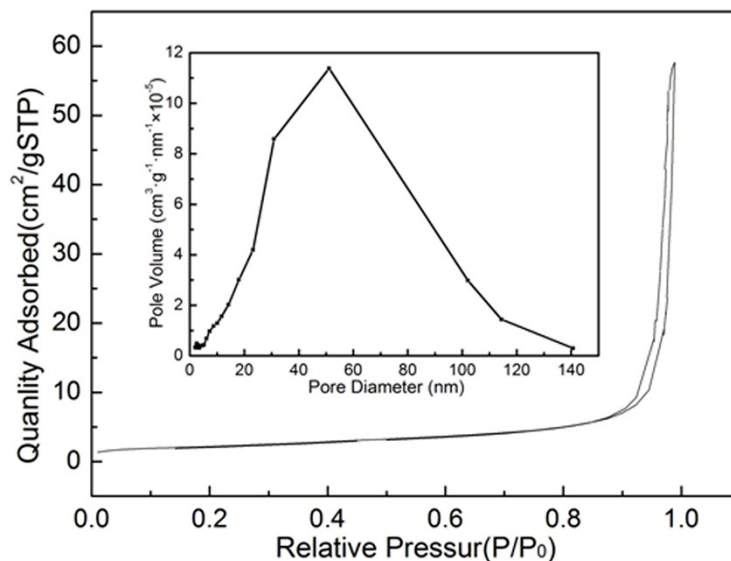

Figure S1. Nitrogen absorption/desorption isotherms and pore-size distribution (inset) of a typical SnO<sub>2</sub> PNS sample.

## S2. Correlation between the mobilities of SnO<sub>2</sub> PNS and P3HT-SnO<sub>2</sub> composite semiconductor

According to the model proposed in Fig. 3, SnO<sub>2</sub> PNS should serve as the major transportation path for the electrons, thus the mobility of P3HT-SnO<sub>2</sub> composite semiconductors would positively correlate with that of SnO<sub>2</sub> PNS. In other words, the higher the SnO<sub>2</sub> PNS mobility is, the higher the P3HT-SnO<sub>2</sub> composite semiconductor mobility is. On the other hand, it is also well known that oxygen vacancy is the major defect in SnO<sub>2</sub>, and a semiconductor possessing perfect crystalline structure would exhibit much higher mobility. So, the mobility of SnO<sub>2</sub> PNS can be improved by reducing the oxygen vacancies. Here the SnO<sub>2</sub> PNS samples were annealed at 350°C in

high-pressure oxygen, and the resultant “pre-treated” SnO<sub>2</sub> PNSs were used in preparing P3HT-SnO<sub>2</sub> composite semiconductors. The results presented in Fig. S2 clearly indicate that, the SnO<sub>2</sub> PNS annealed at 350 °C in 4.0 MPa oxygen exhibits the highest electron concentration and mobility, and the corresponding composite semiconductors also exhibit the highest electron concentration and mobility values. It should also be noted that both the electron concentration and mobility of the annealed SnO<sub>2</sub> PNS increased initially with the increase of oxygen pressure, reaching their maximum values at 4.0 MPa. Accompanying the further increase of oxygen pressure, the electron concentration and mobility decreased instead. This phenomenon may be resulted from the interstitial oxygen (also serves as crystal defect) in SnO<sub>2</sub> formed in higher pressure oxygen.

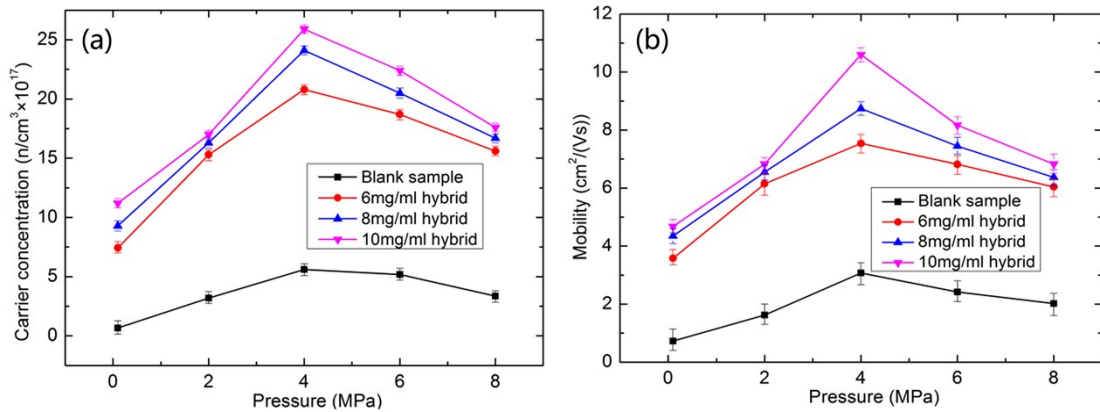

Figure S2. Electron concentration (a) and mobility (b) of SnO<sub>2</sub> PNSs annealed in high-pressure oxygen and the corresponding P3HT-SnO<sub>2</sub> composite semiconductors.

### S3. Verifying the repeatability of above experimental results

Furthermore, we carried out several series of experiments to verify the repeatability

of the above results. Among the samples presented in Table S1, SnO<sub>2</sub> PNS (1) was prepared by hot-pressing the mixture of SnO<sub>2</sub> nanocrystals and dioxane at 60 MPa, 200 °C for 3 h, while SnO<sub>2</sub> PNS (2) and SnO<sub>2</sub> PNS (3) were prepared under similar conditions except the ratio of SnO<sub>2</sub>:dioxane. Besides, the preparation processes of these composite semiconductors were all the same. It is clear that all the composite semiconductors possess much higher carrier concentration and mobility than the corresponding pristine SnO<sub>2</sub> PNSs.

Table S1 Carrier concentration and mobility of some SnO<sub>2</sub> PNS and their corresponding composite semiconductors.

| Samples                                  | SnO <sub>2</sub> PNS (1) |       | SnO <sub>2</sub> PNS (2) |       | SnO <sub>2</sub> PNS (3) |       |
|------------------------------------------|--------------------------|-------|--------------------------|-------|--------------------------|-------|
| SnO <sub>2</sub> nanoparticles / dioxane | 3g/4ml                   |       | 3g/5ml                   |       | 3g/6ml                   |       |
| Hybridization States                     | Before                   | After | Before                   | After | Before                   | After |
| $n / \times 10^{17} \text{cm}^{-3}$      | 1.21                     | 5.17  | 1.65                     | 10.3  | 1.14                     | 4.26  |
| $\mu / \text{cm}^2/\text{Vs}$            | 0.4                      | 1.1   | 0.7                      | 3.3   | 0.3                      | 0.9   |

Note: “before” and “after” hybridization refer to SnO<sub>2</sub> PNSs and P3HT-SnO<sub>2</sub> PNS composite semiconductor, respectively.

#### **S4. Distinguish the effects of pre-treatment in chloroform and forming composite semiconductor with P3HT.**

In fact, the potential reasons for the increase of both carrier concentration and mobility of P3HT-SnO<sub>2</sub> PNS composite semiconductors might include two aspects: the pre-treatment of SnO<sub>2</sub> PNS in chloroform and the formation of composite semiconductor with P3HT. In order to clearly distinguish these two aspects, we

conducted control experiments in which the SnO<sub>2</sub> PNSs were treated under the same conditions with that of preparing P3HT-SnO<sub>2</sub> PNS composite semiconductors, except that no P3HT was used. In a typical experiment, a SnO<sub>2</sub> PNS was heated at 150 °C in a three-necked bottle for 3 h, under a vacuum of  $2.3 \times 10^{-3}$  Pa. Then the SnO<sub>2</sub> PNS was cooled naturally to room temperature, and 20 ml chloroform was injected into the bottle. After being immersed for 24 h, the SnO<sub>2</sub> PNS was recovered and annealed at 140 °C in argon for 20 minutes. By comparing the results of SnO<sub>2</sub> PNSs with and without the pre-treatment in chloroform, it was found that the carrier concentration of SnO<sub>2</sub> PNSs remained almost unchanged while the mobility decreased after such a treatment process. Namely, the carrier concentration of SnO<sub>2</sub> PNS remains at  $1.65 \times 10^{17} \text{ cm}^{-3}$ , but the mobility decreased from  $0.7 \text{ cm}^2/\text{Vs}$  to  $0.5 \text{ cm}^2/\text{Vs}$ .

Therefore, it is reasonable to believe that the increase of carrier concentration and mobility of P3HT-SnO<sub>2</sub> PNS composite semiconductor should arise from the synergetic effect of P3HT and SnO<sub>2</sub>, rather than from the treatment in pure chloroform.
